# Supplementary material for: Self-energy correction and numerical simulation for efficient lead-free double perovskite solar cells
Source: Royal Society of Chemistry journal article supplement (doi:10.1039/d3cp03639a), 2023-11-27
Supplement: d3cp03639a1.pdf [file d3cp03639a1.pdf]

## Supporting information

### Self-energy correction and numerical simulation for efficiency lead-free double perovskite solar cells

The effective masses of electrons ( $m^*_e$ ) and holes ( $m^*_h$ ) are correlated with the curves at the top of VB and bottom of CB by using relation:

$$\frac{1}{m} = \frac{1}{\hbar^2} \frac{\delta^2 E}{\delta k^2}$$

The carrier mobility is calculated employing a simple approach based on deformation potential theory as shown below:

$$\mu = \frac{8\pi^{1/2} \hbar^4 e c_{ii}}{3(m^*)^{5/2} (k_B T)^{3/2} E_1^2}$$

$\hbar$  is the reduced Planck constant,  $e$  is the element charge,  $c_{ii}$  is the elastic constant,  $m^*$  is the effective mass of charge,  $k_B$  is the Boltzmann constant,  $T$  is the absolute temperature, and  $E_1$  is the deformation potential.

The optical properties have been determined from the dielectric function  $\varepsilon = \varepsilon_1 + i\varepsilon_2$ , where the imaginary part  $\varepsilon_2$  can be determined from the momentum matrix elements between the unoccupied and occupied wave functions and the real part  $\varepsilon_1$  can be obtained from the imaginary part  $\varepsilon_2$  by using the Kramer-Kronig relation given by:

$$\varepsilon_1 = 1 + 2P/\pi \int \frac{\omega' \varepsilon_2(\omega')}{(\omega'^2 - \omega^2)} d\omega'$$

VB/CB effective density of states is caculated by following formula:

$$N = 2\left(\frac{m^*k_0T}{2\pi\hbar^2}\right)^{3/2}$$

The approximate thermal velocities of electrons and holes is caculated with

$$v_{th} = \sqrt{\frac{3KT}{m^*}}$$

| <b>material</b>                     | <b>band gap</b> | <b>material</b>                     | <b>band gap</b> | <b>material</b>                     | <b>band gap</b> |
|-------------------------------------|-----------------|-------------------------------------|-----------------|-------------------------------------|-----------------|
| Cs <sub>2</sub> AgBiBr <sub>6</sub> | 1.33            | Cs <sub>2</sub> AgCuBr <sub>6</sub> | 0.00            | Cs <sub>2</sub> TlBiBr <sub>6</sub> | 1.71            |
| Cs <sub>2</sub> AgSbBr <sub>6</sub> | 0.88            | Cs <sub>2</sub> AgTiBr <sub>6</sub> | 0.00            | Cs <sub>2</sub> LiBiBr <sub>6</sub> | 2.94            |
| Cs <sub>2</sub> AgScBr <sub>6</sub> | 2.73            | Cs <sub>2</sub> AgVBr <sub>6</sub>  | 0.00            | Cs <sub>2</sub> NaBiBr <sub>6</sub> | 3.05            |
| Cs <sub>2</sub> AgInBr <sub>6</sub> | 0.20            | Cs <sub>2</sub> AgCrBr <sub>6</sub> | 0.76            | Cs <sub>2</sub> KBiBr <sub>6</sub>  | 3.42            |
| Cs <sub>2</sub> AgAlBr <sub>6</sub> | 1.19            | Cs <sub>2</sub> AgMnBr <sub>6</sub> | 0.00            | Cs <sub>2</sub> RbBiBr <sub>6</sub> | 3.41            |
| Cs <sub>2</sub> AgGaBr <sub>6</sub> | 0.00            | Cs <sub>2</sub> AgFeBr <sub>6</sub> | 0.00            | Cs <sub>2</sub> CuBiBr <sub>6</sub> | 0.63            |
| Cs <sub>2</sub> AgTlBr <sub>6</sub> | 0.00            | Cs <sub>2</sub> AgCoBr <sub>6</sub> | 0.23            | Cs <sub>2</sub> AuBiBr <sub>6</sub> | 0.24            |
| Cs <sub>2</sub> AgCdBr <sub>6</sub> | 0.00            | Cs <sub>2</sub> AgNiBr <sub>6</sub> | 0.00            |                                     |                 |

Table S1 The band gaps of 22 kinds of lead-free double materials by PBE method.

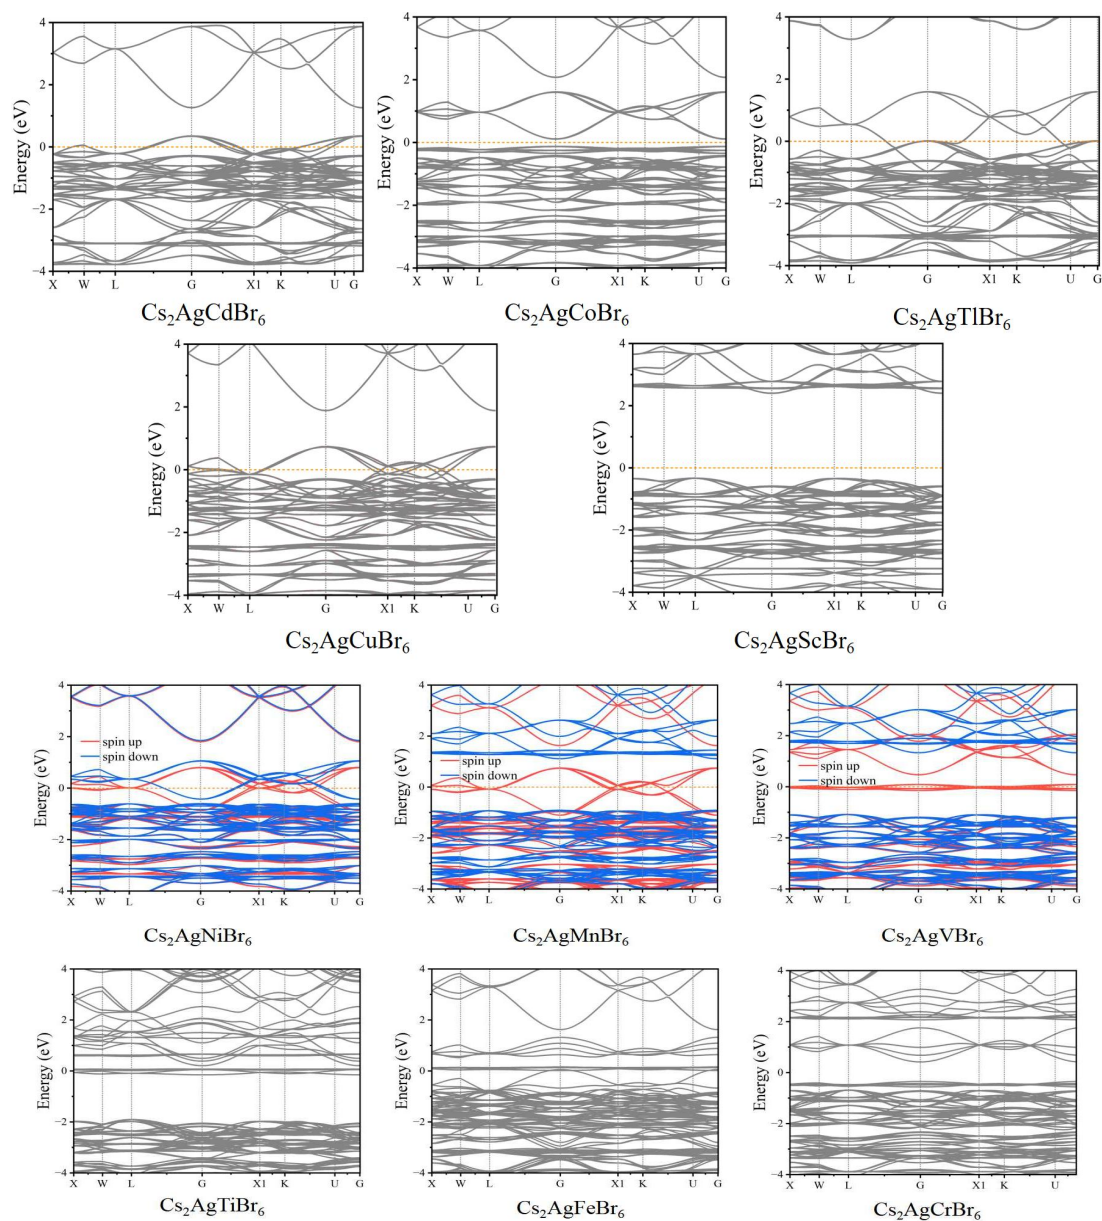

Figure S1 The band gap of  $\text{Cs}_2\text{B}'\text{B}''\text{Br}_6$  with magnetic elements. (5 materials ( $\text{Cs}_2\text{AgCdBr}_6$ ,  $\text{Cs}_2\text{AgCoBr}_6$ ,  $\text{Cs}_2\text{AgCuBr}_6$ ,  $\text{Cs}_2\text{AgScBr}_6$ ,  $\text{Cs}_2\text{AgTiBr}_6$ ) are calculated to be non-magnetic. And there are 6 materials with magnetic properties ( $\text{Cs}_2\text{AgMnBr}_6$ ,  $\text{Cs}_2\text{AgNiBr}_6$ ,  $\text{Cs}_2\text{AgVBr}_6$ ,  $\text{Cs}_2\text{AgTiBr}_6$ ,  $\text{Cs}_2\text{AgCrBr}_6$ ,  $\text{Cs}_2\text{AgFeBr}_6$ .)

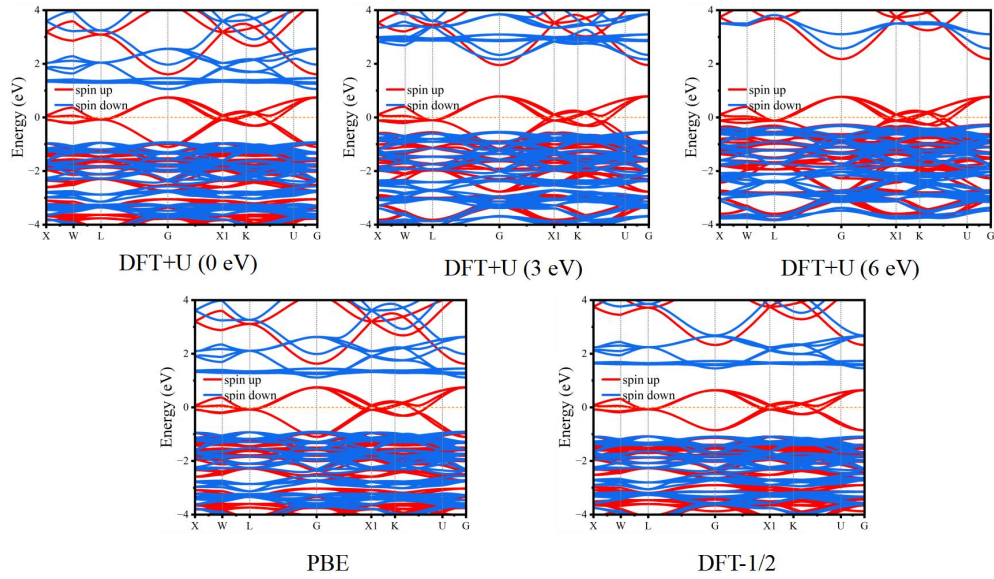

Figure S2. The band gap of  $\text{Cs}_2\text{AgMnBr}_6$  with PBE, DFT-1/2 and DFT+U ( $U_{\text{eff}} = 0, 3, 6$  eV) method.

Table S2 The ground state and ferromagnetic or antiferromagnetic energy of magnetic materials. (The antiferromagnetic energies of  $\text{Cs}_2\text{AgTiBr}_6$ ,  $\text{Cs}_2\text{AgCrBr}_6$  and  $\text{Cs}_2\text{AgFeBr}_6$  are lower than the ferromagnetic energies, showing the antiferromagnetic ground states, while  $\text{Cs}_2\text{AgMnBr}_6$ ,  $\text{Cs}_2\text{AgNiBr}_6$  and  $\text{Cs}_2\text{AgVBr}_6$  show the ferromagnetic ground states.)

| material                      | $\text{Cs}_2\text{AgMnBr}_6$ | $\text{Cs}_2\text{AgNiBr}_6$ | $\text{Cs}_2\text{AgVBr}_6$ | $\text{Cs}_2\text{AgTiBr}_6$ | $\text{Cs}_2\text{AgCrBr}_6$ | $\text{Cs}_2\text{AgFeBr}_6$ |
|-------------------------------|------------------------------|------------------------------|-----------------------------|------------------------------|------------------------------|------------------------------|
| ferromagnetic energy (eV)     | -136.67                      | -116.12                      | -139.11                     | -140.06                      | -139.77                      | -129.81                      |
| antiferromagnetic energy (eV) | -136.33                      | -116.04                      | -139.02                     | -140.07                      | -139.81                      | -130.15                      |
| ground state                  | FM                           | FM                           | FM                          | AFM                          | AFM                          | AFM                          |

Table S3 The band gap and magnetic moment of 11 materials with magnetic elements.

| material                            | E <sub>g</sub> (eV) | M (μ <sub>B</sub> ) | material                            | E <sub>g</sub> (eV) | M (μ <sub>B</sub> ) |
|-------------------------------------|---------------------|---------------------|-------------------------------------|---------------------|---------------------|
| Cs <sub>2</sub> AgCdBr <sub>6</sub> | 0.00                | 0.00                | Cs <sub>2</sub> AgMnBr <sub>6</sub> | 0.00                | 14.84               |
| Cs <sub>2</sub> AgCoBr <sub>6</sub> | 0.23                | 0.00                | Cs <sub>2</sub> AgNiBr <sub>6</sub> | 0.00                | 1.86                |
| Cs <sub>2</sub> AgCuBr <sub>6</sub> | 0.00                | 0.00                | Cs <sub>2</sub> AgVBr <sub>6</sub>  | 0.00                | 7.17                |
| Cs <sub>2</sub> AgScBr <sub>6</sub> | 2.73                | 0.00                | Cs <sub>2</sub> AgTiBr <sub>6</sub> | 0.00                | 0.00                |
| Cs <sub>2</sub> AgTlBr <sub>6</sub> | 0.00                | 0.00                | Cs <sub>2</sub> AgCrBr <sub>6</sub> | 0.76                | 0.00                |
|                                     |                     |                     | Cs <sub>2</sub> AgFeBr <sub>6</sub> | 0.00                | 0.00                |

Table S4 The decomposition enthalpy and binding energy of Cs<sub>2</sub>B'B''Br<sub>6</sub> (B' = Ag, Au, Cu; B'' = Bi, Al, Sb, In).

| material                            | binding energy (eV) | decomposition enthalpy ΔH <sub>d</sub> |
|-------------------------------------|---------------------|----------------------------------------|
| Cs <sub>2</sub> AgBiBr <sub>6</sub> | -2.92               | -0.057                                 |
| Cs <sub>2</sub> CuBiBr <sub>6</sub> | -2.97               | -0.081                                 |
| Cs <sub>2</sub> AuBiBr <sub>6</sub> | -2.87               | -0.061                                 |
| Cs <sub>2</sub> AgSbBr <sub>6</sub> | -2.88               | -0.064                                 |
| Cs <sub>2</sub> AgInBr <sub>6</sub> | -2.81               | -0.050                                 |
| Cs <sub>2</sub> AgAlBr <sub>6</sub> | -3.00               | -0.180                                 |

The binding energy is calculated by

$$\Delta E_{(Cs_2B'B''Br_6)} = \frac{E_{tot}(Cs_2B'B''Br_6) - k \times E_s(Cs) - l \times E_s(B') - m \times E_s(B'') - n \times E_s(Br)}{k+l+m+n}$$

The decomposition enthalpy (ΔH<sub>d</sub>) is calculated by

$$\Delta H_d = E_{rxn} = E_{ABCD} - E_{A-B-C-D}$$

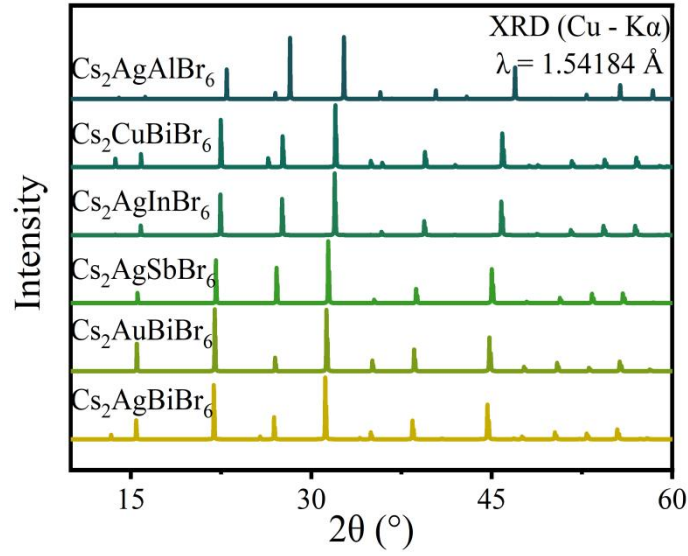

Figure S3 XRD patterns of all selected materials have been shown. It clearly shows that they all have similar diffraction peaks, indicating their similar crystal structures.

Table S5 The calculated elastic constants  $C_{11}$ ,  $C_{12}$ ,  $C_{44}$ , Bulk modulus  $B$ , Shear modulus  $G$ , Young modulus  $E$ , Pugh's ratio ( $B/G$ ), Poisson's ratio ( $\nu$ ) of  $\text{Cs}_2\text{B}'\text{B}''\text{Br}_6$  ( $\text{B}' = \text{Ag, Au, Cu}$ ;  $\text{B}'' = \text{Bi, Al, Sb, In}$ ).

| material                     | $C_{11}$ | $C_{12}$ | $C_{44}$ | $C_{12}-C_{44}$ | $B$   | $G$   | $E$   | $B/G$ | $\nu$ |
|------------------------------|----------|----------|----------|-----------------|-------|-------|-------|-------|-------|
| $\text{Cs}_2\text{AgBiBr}_6$ | 34.52    | 10.26    | 9.96     | 0.3             | 18.35 | 10.78 | 27.04 | 1.70  | 0.25  |
| $\text{Cs}_2\text{AgSbBr}_6$ | 25.83    | 10.55    | 9.91     | 0.64            | 15.64 | 8.93  | 22.51 | 1.75  | 0.26  |
| $\text{Cs}_2\text{AuBiBr}_6$ | 16.85    | 13.67    | 6.28     | 7.39            | 14.73 | 3.64  | 10.09 | 4.04  | 0.39  |
| $\text{Cs}_2\text{CuBiBr}_6$ | 17.31    | 12.68    | 8.88     | 3.8             | 14.22 | 5.21  | 13.92 | 2.73  | 0.33  |
| $\text{Cs}_2\text{AgAlBr}_6$ | 14.29    | 12.47    | 11.23    | 1.24            | 13.08 | 4.56  | 12.25 | 2.87  | 0.34  |
| $\text{Cs}_2\text{AgInBr}_6$ | 13.17    | 13.03    | 8.71     | 4.32            | 13.07 | 2.51  | 7.07  | 5.21  | 0.41  |

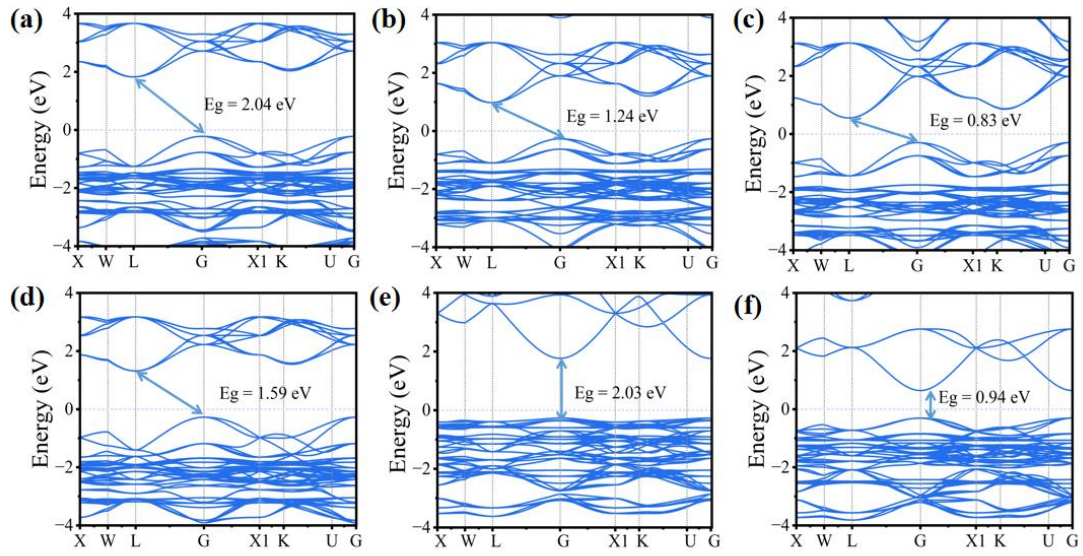

Figure S4 Band gap for six materials (a)  $\text{Cs}_2\text{AgBiBr}_6$  (b)  $\text{Cs}_2\text{CuBiBr}_6$  (c)  $\text{Cs}_2\text{AuBiBr}_6$  (d)  $\text{Cs}_2\text{AgSbBr}_6$  (e)  $\text{Cs}_2\text{AgAlBr}_6$  and (f)  $\text{Cs}_2\text{AgInBr}_6$ .

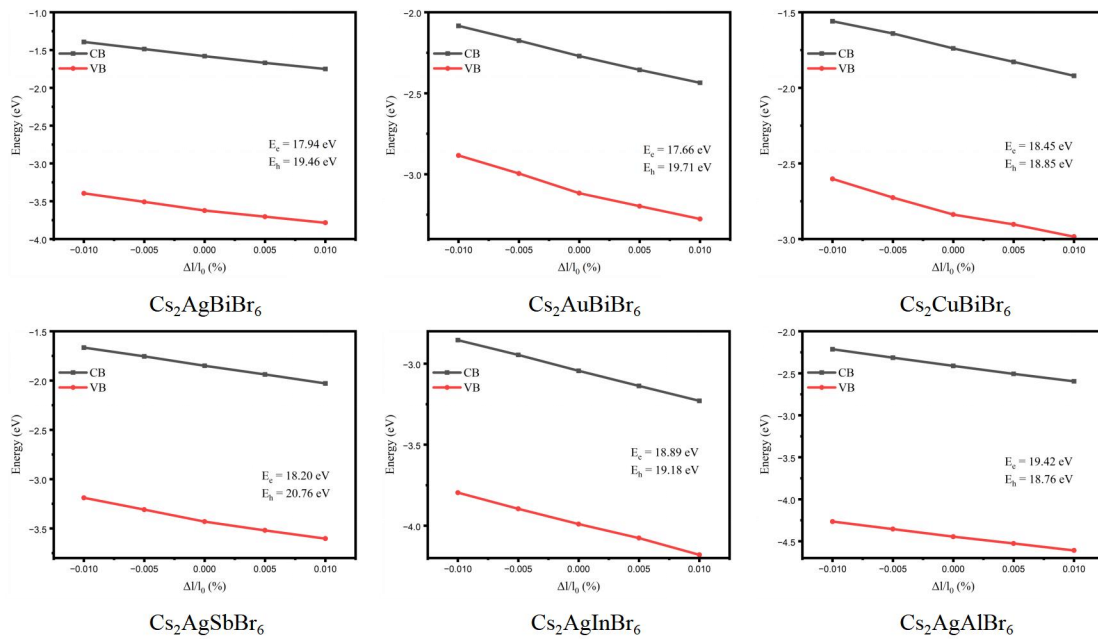

Figure S5. The deformation potential of  $\text{Cs}_2\text{B}'\text{B}''\text{Br}_6$  ( $\text{B}' = \text{Ag, Au, Cu}$ ;  $\text{B}'' = \text{Bi, Al, Sb, In}$ ).

The shift in the band energy ( $\Delta E$ ) with respect to a small lattice dilation ( $\Delta l$ ) along a lattice ( $l_0$ ) direction ( $E_1 = \Delta E / [\Delta l / l_0]$ ) is interpreted as the deformation potential.

We have calculated the band structure of unit cells at five selected deformed lattice constants:  $0.990a_0$ ,  $0.995a_0$ ,  $1.000a_0$ ,  $1.005a_0$  and  $1.010a_0$ , where  $a_0$  is lattice parameter without any strain.

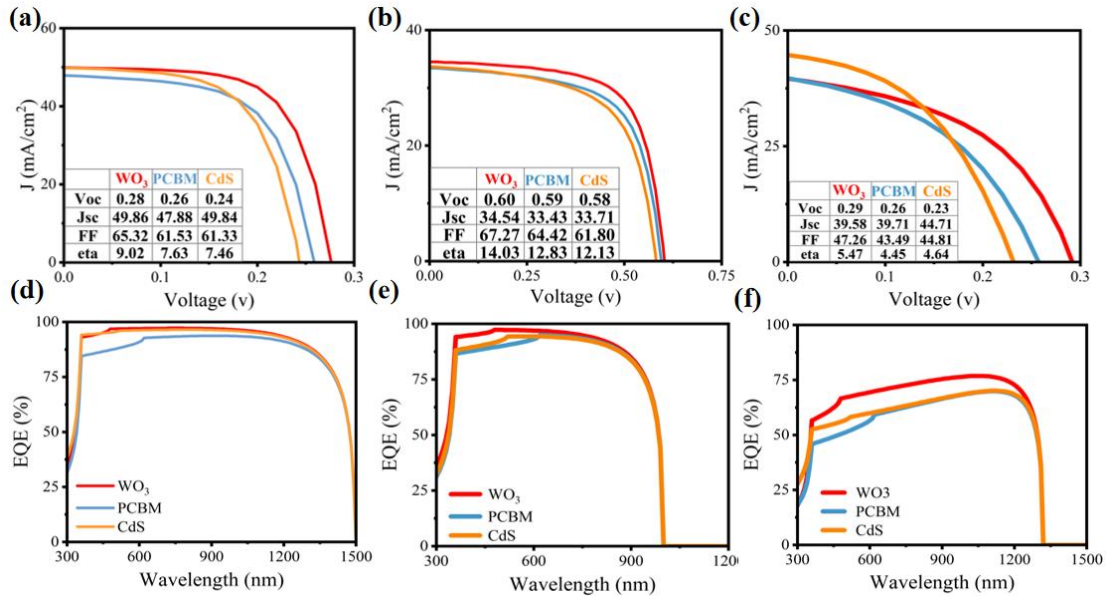

Figure S6 J-V characteristic and EQE-wavelength of PSC under initial simulation condition, respectively (a,d) for  $\text{Cs}_2\text{AuBiBr}_6$ , (b,e) for  $\text{Cs}_2\text{CuBiBr}_6$ , (c,f) for  $\text{Cs}_2\text{AgInBr}_6$ .

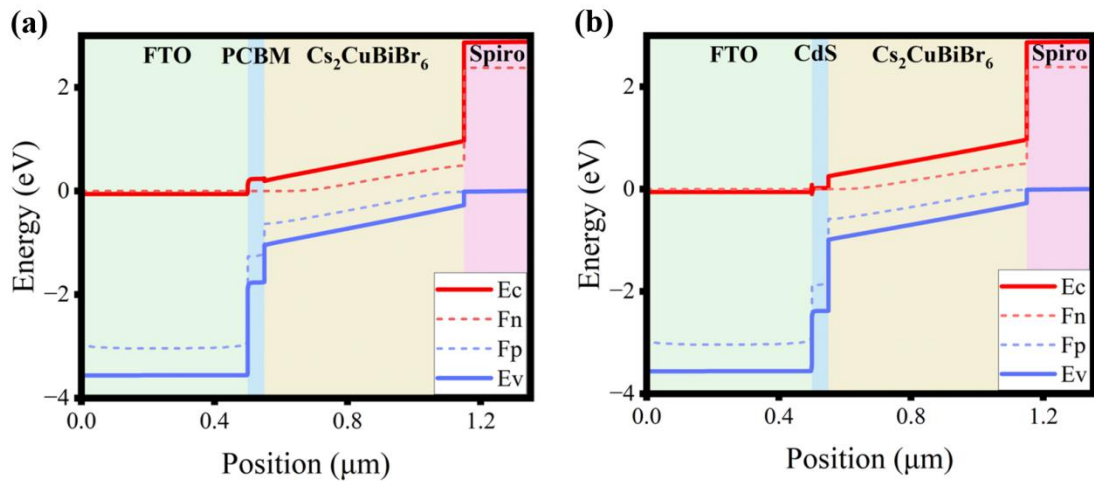

Figure S7 The electronic band diagram of the proposed photovoltaic solar cell with (a) FTO/PCBM/ $\text{Cs}_2\text{CuBiBr}_6$ /Spiro-OMeTAD/Ag configuration and (b) FTO/CdS/ $\text{Cs}_2\text{CuBiBr}_6$ /Spiro-OMeTAD/Ag configuration.
